# Supplementary material for: Retention of patients in opioid substitution treatment: A systematic review
Source: PLoS One. 2020 May 14;15(5):e0232086. doi: 10.1371/journal.pone.0232086 (PMC7224511; doi:10.1371/journal.pone.0232086)
Supplement: S1 Checklist — (DOC) [file pone.0232086.s008.doc]

| **Section/topic** | **#** | **Checklist item** | **Reported on page #** |
| --- | --- | --- | --- |
| **TITLE** | | |  |
| Title | 1 | **Identify the report as a systematic review, meta-analysis, or both.**  Full Title: Retention of patients in opioid substitution treatment: a systematic review | Title page |
| **ABSTRACT** | | |  |
| Structured summary | 2 | **Provide a structured summary including, as applicable: background; objectives; data sources; study eligibility criteria, participants, and interventions; study appraisal and synthesis methods; results; limitations; conclusions and implications of key findings; systematic review registration number.** | Abstract  Page 2 |
| **INTRODUCTION** | | |  |
| Rationale | 3 | **Describe the rationale for the review in the context of what is already known.** | Introduction  Page 3-4 |
| Objectives | 4 | **Provide an explicit statement of questions being addressed with reference to participants, interventions, comparisons, outcomes, and study design (PICOS).** | Introduction (aims)  Page 5 |
| **METHODS** | | |  |
| Protocol and registration | 5 | **Indicate if a review protocol exists, if and where it can be accessed (e.g., Web address), and, if available, provide registration information including registration number.** | Methods, (Protocol and Registration)Page 5 |
| Eligibility criteria | 6 | **Specify study characteristics (e.g., PICOS, length of follow-up) and report characteristics (e.g., years considered, language, publication status) used as criteria for eligibility, giving rationale.** | Methods,  (Eligibility criteria  Page 5-6); Supplementary material S1 Table) |
| Information sources | 7 | **Describe all information sources (e.g., databases with dates of coverage, contact with study authors to identify additional studies) in the search and date last searched.** | Methods (Information sources and search page 6 |
| Search | 8 | Present full electronic search strategy for at least one database, including any limits used, such that it could be repeated. | Supplementary material S2) |
| Study selection | 9 | **State the process for selecting studies (i.e., screening, eligibility, included in systematic review, and, if applicable, included in the meta-analysis).** | Methods (Study Selection and Data Extraction  Page 7 ) |
| Data collection process | 10 | **Describe method of data extraction from reports (e.g., piloted forms, independently, in duplicate) and any processes for obtaining and confirming data from investigators.** | Methods (Study Selection and Data Extraction  Page 7; Supplementary material S3 ) |
| Data items | 11 | **List and define all variables for which data were sought (e.g., PICOS, funding sources) and any assumptions and simplifications made.** | N/A |
| Risk of bias in individual studies | 12 | **Describe methods used for assessing risk of bias of individual studies (including specification of whether this was done at the study or outcome level), and how this information is to be used in any data synthesis.** | Methods (Risk of Bias in Individual Studies page 7-8) |
| Summary measures | 13 | **State the principal summary measures (e.g., risk ratio, difference in means).** | Methods(Summary Measures and Synthesis of Results page 8) |
| Synthesis of results | 14 | **Describe the methods of handling data and combining results of studies, if done, including measures of consistency (e.g., I2) for each meta-analysis.** | Methods (Summary Measures and Synthesis of Results page 8- 9) |

Page 1 of 2

| **Section/topic** | **#** | **Checklist item** | **Reported on page #** |
| --- | --- | --- | --- |
| Risk of bias across studies | 15 | Specify any assessment of risk of bias that may affect the cumulative evidence (e.g., publication bias, selective reporting within studies). | N/A |
| Additional analyses | 16 | Describe methods of additional analyses (e.g., sensitivity or subgroup analyses, meta-regression), if done, indicating which were pre-specified. | N/A |
| **RESULTS** | | |  |
| Study selection | 17 | **Give numbers of studies screened, assessed for eligibility, and included in the review, with reasons for exclusions at each stage, ideally with a flow diagram.** | Results (Study Selection page 10; Figure PRISMA flowchart) |
| Study characteristics | 18 | **For each study, present characteristics for which data were extracted (e.g., study size, PICOS, follow-up period) and provide the citations.** | Results,  Study Characteristics page 10-12; Supplementary material, S5) |
| Risk of bias within studies | 19 | **Present data on risk of bias of each study and, if available, any outcome level assessment (see item 12).** | Results (Risk of Bias within Studies page 13; Supplementary material S6) |
| Results of individual studies | 20 | **For all outcomes considered (benefits or harms), present, for each study: (a) simple summary data for each intervention group (b) effect estimates and confidence intervals, ideally with a forest plot.** | Supplementary material S7 |
| Synthesis of results | 21 | **Present results of each meta-analysis done, including confidence intervals and measures of consistency.** | N/A  Narrative synthesis pages 14-24 |
| Risk of bias across studies | 22 | **Present results of any assessment of risk of bias across studies (see Item 15).** | N/A |
| Additional analysis | 23 | **Give results of additional analyses, if done (e.g., sensitivity or subgroup analyses, meta-regression [see Item 16]).** | N/A |
| **DISCUSSION** | | |  |
| Summary of evidence | 24 | **Summarize the main findings including the strength of evidence for each main outcome; consider their relevance to key groups (e.g., healthcare providers, users, and policy makers).** | Discussion  Page 25 |
| Limitations | 25 | **Discuss limitations at study and outcome level (e.g., risk of bias), and at review-level (e.g., incomplete retrieval of identified research, reporting bias).**   - How it MMT viewed? - What would elevatemore s the mess slightly? - How have other interventions overcome this mess? (or a similar mess?) | Limitations  Page 26 |
| Conclusions | 26 | **Provide a general interpretation of the results in the context of other evidence, and implications for future research.** | Discussion  Page 25-27 |
| **FUNDING** | | |  |
| Funding | 27 | **Describe sources of funding for the systematic review and other support (e.g., supply of data); role of funders for the systematic review.** | Funding  Page 28 |

*From:*  Moher D, Liberati A, Tetzlaff J, Altman DG, The PRISMA Group (2009). Preferred Reporting Items for Systematic Reviews and Meta-Analyses: The PRISMA Statement. PLoS Med 6(7): e1000097. doi:10.1371/journal.pmed1000097

For more information, visit: **www.prisma-statement.org**.

Page 2 of 2
